# Modelling the Potential Role of Media Campaigns on the Control of Listeriosis

C. W. Chukwu<sup>1\*</sup>, F. Nyabadza<sup>2</sup> and Fatmawati<sup>3</sup>

<sup>1,2</sup>*Department of Mathematics and Applied Mathematics, University of Johannesburg, Auckland Park Kingsway Campus, PO Box 524, 2006, Johannesburg, South Africa*

<sup>3</sup>*Department of Mathematics, Faculty of Science and Technology, Universitas Airlangga, Surabaya 60115, Indonesia.*

## Abstract

Human Listeria infection is a food-borne disease caused by the consumption of contaminated food products by the bacterial pathogen, Listeria. In this paper, we propose a mathematical model to analyze the impact of media campaigns on the spread and control of Listeriosis. The model exhibited three equilibria namely; disease-free, Listeria-free and endemic equilibria. The food contamination threshold ( $\mathcal{R}_f$ ) is determined and the local stability analyses of the model discussed. Sensitivity analysis is done to determine the model parameters that most affect the severity of the disease. Numerical simulations were carried out to assess the role of media campaigns on the Listeriosis spread. The results show that; an increase in the intensity of the media awareness campaigns, the removal rate of contaminated food products, a decrease in the contact rate of Listeria by humans results in fewer humans getting infected, thus leading to the disease eradication. An increase in the depletion of media awareness campaigns results in more humans being infected with Listeriosis. These findings may significantly impact policy and decision making in the control of Listeriosis disease.

**Keywords:** Equilibria. Listeria. Numerical Simulations. Food contamination threshold.

---

\*Communicated by: Email: [wiliam.chukwu@gmail.com](mailto:wiliam.chukwu@gmail.com)

# 1 Introduction

Listeriosis is a serious and severe food-borne disease that affects the human population globally. The disease is caused by a bacteria called *Listeria monocytogenes* which exists in the environment as its primary host (soil, water, ready-to-eat (RTE) foods and contaminated food products) [1,2]. Human beings contract Listeriosis through the ingestion of contaminated RTE food products such as cantaloupes, meat, Ricotta Salata cheese, vegetables, polony, bean sprouts, ham, or directly from the environment [3,4]. The epidemiology of Listeriosis is clearly articulated in [1,4,12].

Before the 2017 outbreak in South Africa, an average of 60 to 80 confirmed Listeriosis disease cases were recorded annually (i.e., approximately 1 case per week). The recent outbreak in South Africa, which occurred from 1 January 2017 to 17 July 2018, had 1 060 confirmed cases, with 216 (26.8%) deaths. This was the world's largest ever documented Listeriosis outbreak [6]. The source of the disease was traced to be contaminated RTE processed meat products. Also, Listeriosis outbreaks resulting from human consumption of different kinds of contaminated RTE food products occur commonly in the United States of America, Canada and Europe [3].

Media campaigns and media-driven awareness programs such as print media, social media, internet, television, radio and advertisements play an essential role in the disseminating information about the spread of infectious disease outbreaks [7]. In particular, they influence individuals and the public health care systems' behavior in the implementation of control strategies to contain the spread of diseases. Dissemination of information educates people and helps them take precautionary measures such as; practising better hygiene; factory workers wearing clean gloves to avoid cross-contamination of food products during food production/manufacturing.

In recent times, researchers have used mathematical models to describe the effect and impact of media campaigns or several awareness programs on the dynamics of infectious such as Ebola [8], Human Immunodeficiency Virus [13], Human Influenza [14] e.t.c. Misra *et al.* [15], used a non-linear mathematical model which assumed that due to awareness programs by media, once the population becomes aware of the disease spread, they avoid contacts with the infectives and therefore form a new class of individuals called the aware class, who become susceptible again if their awareness wanes over time. The model analysis revealed that the number of infectives decreases with an increase in media campaigns. Kaur [16], extended the work by Misra by assuming that aware susceptibles do not lose awareness but can also interact with infected individuals and get infected, albeit at a lower rate. Their study suggested that with the increase in the rate of implementation of awareness programs via media, there is a subsequent decline in the number of infected in any targeted population under consideration. Authors in [8] used a mathematical model to describe the transmission dynamics of Ebola in the presence of asymptomatic cases and the impact of media campaigns on the disease transmission was represented by a linearly decreasing function. Their results showed that messages sent through media have a more significant effect on reducing Ebola cases if they are more effective and spaced out. An *SIRS* model was proposed in [17] to investigate the impact of awareness programs by considering private and public awareness, which reduces the contact rate between unaware and aware population and the effect/impact of public information campaigns on disease prevalence. It was shown that both private and public awareness could reduce the size of epidemic outbreaks. A smoking cessation model with media campaigns was presented [18]. The results showed that the reproduction number was suppressed when media campaigns that focus on smoking cessation

were increased. Thus, spreading information to encourage smokers to quit smoking was an effective intervention. According to [19], an *SIRS* model was used to analyze the role of information and limited optimal treatment on disease prevalence. The model considered the growth rate of information proportional to a saturated function of infected individuals. The results from the mathematical analysis showed that the combined effects of information and treatment are more effective and economical in the control of the infection. Exponential functions have also been used to model the impact of media awareness campaigns on people's behaviour, which affects the evolution of infectious diseases [20,21]. In particular, the effects of Twitter messages on reducing the transmission rate of the influenza virus was studied in [21]. The result revealed that Twitter messages had a substantial influence on the dynamics of influenza disease spread.

To date, there are very few mathematical models on the dynamics of Listeriosis (see, for instance, [9–12]), let alone those investigating the potential role of media awareness campaigns on the dynamics of Listeriosis. This paper is motivated by the work done in [15]. We formulate a mathematical model to study the impact and effects of media campaigns on the dynamics of Listeriosis disease resulting from the consumption of contaminated RTE in the human population. We describe the model in detail in the following section.

The outline of this paper is as follows; Section 1 introduces the research paper followed by the model described in Section 2. The model basic properties and analyses are presented in Section 3. Numerical simulations were done and presented in Section 4. Section 5 concludes the paper.

## 2 Model description

The human population is divided into four sub-classes, viz: Susceptibles  $S_h(t)$ , aware susceptibles  $S_a(t)$ , the infected  $I_h(t)$  and the recovered  $R_h(t)$ . Individuals are recruited at a rate proportional to the size of the human population  $N(t)$  where

$$N(t) = S_h(t) + S_a(t) + I_h(t) + R_h(t).$$

The recruitment rate is given by  $\mu_h N(t)$  where  $\mu_h$  is natural birth/mortality rate. Upon infection with *Listeria* from contaminated food, the susceptibles move into the infectious class  $I_h(t)$  with a force of infection  $\lambda_h(t)$ , where  $\lambda_h(t) = \beta_{f_1} F_c$  with  $\beta_{f_1}$  being the rate at which humans gets infected and  $F_c(t)$  the contaminated food products. Here,  $\lambda_h(t)$  describes the force of infection by the consumption of contaminated food products. The susceptible individuals can also move to the awareness class at a rate  $\rho$  as a result of the interaction with the media campaigns. We assume that media campaigns wane over time and the aware individuals can revert to being susceptible again at a rate  $\omega_1$ . The infected individuals recover at a rate  $\gamma$  with immunity after treatment. These individuals who recover after some time can also lose their immunity and become susceptible again at a rate  $\delta_h$ . We assume a constant human population  $N(t)$ , which consists of individuals who do not work in the factory over the modelling time. Further, we assume that aware individuals cannot be infected as their awareness protects them from contracting the disease. Given that the bacteria survive even at  $4^0C$ , it can die or grow in its host or the environment at significantly low temperatures. Let  $r_l$  and  $\xi$  denote the growth and removal rate of the of *Listeria*,  $L(t)$ . Our model assumes a logistic growth of *Listeria* with carrying capacity  $K_L$ . The non-contaminated food products  $F_n(t)$  can be contaminated as a result of interaction with

the bacteria from the environment that comes, via the workers, exchange of gloves or utensils during food manufacturing and also through the contact with contaminated food  $F_c(t)$  with a force of infection  $\lambda_f(t)$ , where

$$\lambda_f(t) = \beta_L L(t) + \beta_{f_2} F_c(t).$$

The parameters  $\beta_L$  and  $\beta_{f_2}$  are the contact rate of Listeria and the contamination rate of non-contaminated food by contaminated food products, respectively. The contaminated food products are then responsible for transmitting Listeriosis disease to the human population through ingestion of the contaminated food products. The total amount of food products,  $F(t)$ , at any given time is given by

$$F(t) = F_n(t) + F_c(t),$$

where  $\mu_f$  is the rate of removal of food products through consumption. Let  $M_a$  be the cumulative density of media campaigns with maximum intensity,  $M$ , at which media awareness campaigns are implemented,  $\pi_0$  the rate of implementation of the media awareness campaigns and  $\mu_0$  the rate of depletion of media awareness. The above model descriptions and Figure 1 gives the

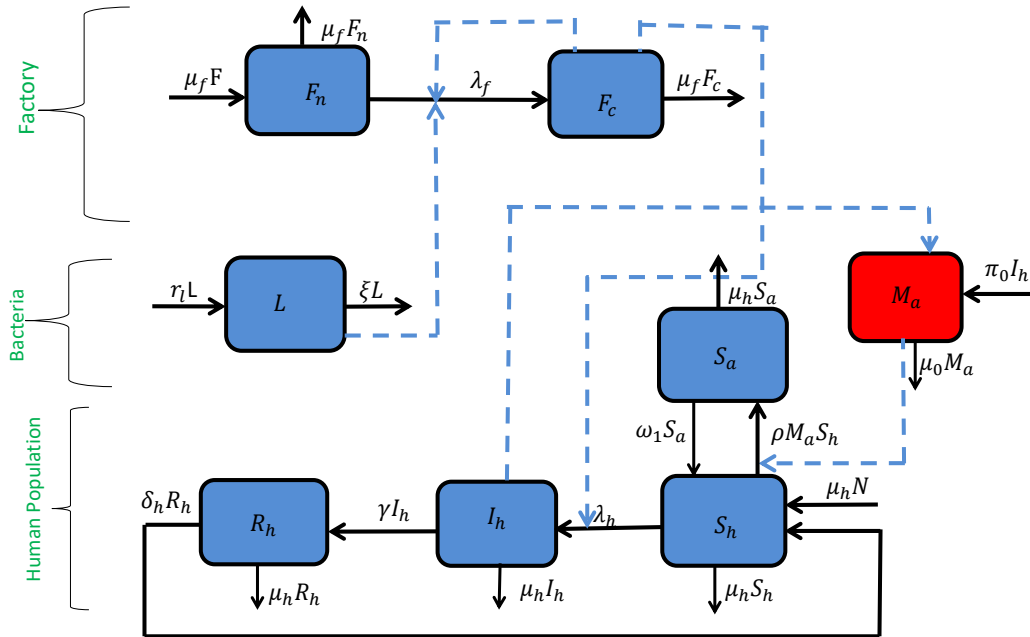

**Figure 1:** Shows the model flow diagram. The solid arrows represent the transitions between the compartments while the dotted lines represent the influences on the solid arrows and the compartments.

following systems of non-linear ordinary differential equations:

$$\left\{ \begin{array}{l} \frac{dS_h}{dt} = \mu_h N + \delta_h R_h + \omega_1 S_a - \lambda_h S_h - \mu_h S_h - \rho M_a S_h, \\ \frac{dS_a}{dt} = \rho M_a S_h - (\omega_1 + \mu_h) S_a, \\ \frac{dI_h}{dt} = \lambda_h S_h - (\mu_h + \gamma) I_h, \\ \frac{dR_h}{dt} = \gamma I_h - (\mu_h + \delta_h) R_h, \\ \frac{dL}{dt} = r_l L \left( 1 - \frac{L}{K_L} \right) - \xi L, \\ \frac{dM_a}{dt} = \pi_0 I_h - \mu_0 M_a, \\ \frac{dF_n}{dt} = \mu_f F - \lambda_f F_n - \mu_f F_n, \\ \frac{dF_c}{dt} = \lambda_f F_n - \mu_f F_c. \end{array} \right. \quad (1)$$

All parameters for the model system (1) are assumed to be non-negative for all time  $t > 0$ . By setting

$$s_h = \frac{S_h}{N}, \quad s_a = \frac{S_a}{N}, \quad i_h = \frac{I_h}{N}, \quad r_h = \frac{R_h}{N}, \quad l = \frac{L}{K_L}, \quad m_a = \frac{M_a}{M}, \quad f_n = \frac{F_n}{F}, \quad f_c = \frac{F_c}{F}$$

and given that  $r_h(t) = 1 - s_h(t) - s_a(t) - i_h(t)$  we have the following rescaled system

$$\left\{ \begin{array}{l} \frac{ds_h}{dt} = \mu_h + \delta_h(1 - s_h - s_a - i_h) + \omega_1 s_a - (\tilde{\lambda}_h + \mu_h + \tilde{\rho} m_a) s_h, \\ \frac{ds_a}{dt} = \tilde{\rho} m_a s_h - (\omega_1 + \mu_h) s_a, \\ \frac{di_h}{dt} = \tilde{\lambda}_h s_h - (\mu_h + \gamma) i_h, \\ \frac{dl}{dt} = r_l l(1 - l) - \xi l, \\ \frac{dm_a}{dt} = \pi i_h - \mu_0 m_a, \\ \frac{df_n}{dt} = \mu_f - (\tilde{\lambda}_f + \mu_f) f_n, \\ \frac{df_c}{dt} = \tilde{\lambda}_f f_n - \mu_f f_c, \end{array} \right. \quad (2)$$

where

$$\tilde{\lambda}_h = \beta_1 f_c, \quad \tilde{\lambda}_f = \beta_2 l + \beta_3 f_c, \quad \alpha = \frac{N}{M} \quad \tilde{\rho} = \rho M, \quad \pi = \pi_0 \alpha,$$

with  $\beta_1 = \beta_{f_1} F$ ,  $\beta_2 = \beta_l K_L$ ,  $\beta_3 = \beta_{f_2} F$  and initial conditions

$$\begin{array}{l} s_h(0) = s_{h0} > 0, s_a(0) = s_{a0} > 0, i_h(0) = i_{h0} \geq 0, l(0) = l_0 \geq 0, \\ m_a(0) = m_{a0} \geq 0, f_n(0) = f_{n0} \geq 0, f_c(0) = f_{c0} \geq 0. \end{array} \quad (3)$$

### 3 Model properties and analysis

#### 3.1 Positivity of solutions

We prove the positivity of the solutions of model system (2) with initial conditions (3). First, we state the following Lemma as given in [23].

**Lemma 1.** *Suppose  $\Omega \subset \mathbb{R} \times C^n$  is open,  $f_i \in C(\Omega, \mathbb{R}), i = 1, 2, \dots, n$ . If*

$$f_i|_{x_i(t)=0, X_t \in C_{0+}^n} \geq 0, \quad X_t = (x_1(t), \dots, x_n(t))^T, \quad i = 1, 2, \dots, n,$$

*then  $C_{+0}^n$  is the invariant domain of the following equations*

$$\dot{x}_i(t) = f_i(t, X_t), \quad t \geq 0, \quad i = 1, 2, \dots, n. \quad (4)$$

*If  $f_i|_{x_i(t)=0, X_t \in C_{-0}^n} \leq 0, X_t = (x_1(t), \dots, x_n(t))^T, i = 1, 2, \dots, n$ , then  $C_{-0}^n$  is the invariant domain of equations (4).*

We have the following Theorem on the invariance of system (2).

**Theorem 1.** *Each solution  $(s_h(t), s_a(t), I_h(t), l(t), m_a(t), f_n(t), f_c(t))$  of the model system (2) with the non-negative initial conditions (3) is non-negative for all  $t > 0$ .*

*Proof.* Let  $X = (s_h, s_a, I_h, l, m_a, f_n, f_c)^T$  and

$$g(X) = (g_1(X), g_2(X), g_3(X), g_4(X), g_5(X), g_6(X), g_7(X))^T,$$

then we can re-write the model system (2) as follows:

$$\dot{X} = g(X)$$

where

$$g(X) = \begin{pmatrix} g_1(X) \\ g_2(X) \\ g_3(X) \\ g_4(X) \\ g_5(X) \\ g_6(X) \\ g_7(X) \end{pmatrix} = \begin{pmatrix} \mu_h + \delta_h(1 - s_h - s_a - i_h) + \omega_1 s_a - (\tilde{\lambda}_h + \mu_h + \tilde{\rho} m_a) s_h, \\ \tilde{\rho} m_a s_h - (\omega_1 + \mu_h) s_a, \\ \tilde{\lambda}_h s_h - (\mu_h + \gamma) i_h, \\ r_l l(1 - l) - \xi l, \\ \pi_0 \alpha i_h - \mu_0 m_a, \\ \mu_f - (\tilde{\lambda}_f + \mu_f) f_n, \\ \tilde{\lambda}_f f_n - \mu_f f_c, \end{pmatrix}. \quad (5)$$

From (5), setting all the classes to zero, we have that

$$\begin{aligned} \left. \frac{ds_h(t)}{dt} \right|_{s_h=0} &= (\mu_h + \omega_1 s_a) > 0, & \left. \frac{ds_a(t)}{dt} \right|_{s_a=0} &= \rho M m_a s_h > 0, \\ \left. \frac{di_h(t)}{dt} \right|_{i_h=0} &= \tilde{\lambda}_h s_h > 0, & \left. \frac{dl(t)}{dt} \right|_{l=0} &= 0, & \left. \frac{dm_a(t)}{dt} \right|_{m_a=0} &= \pi_0 \alpha i_h > 0, \\ \left. \frac{df_n(t)}{dt} \right|_{f_n=0} &= \mu_f > 0, & \left. \frac{df_c(t)}{dt} \right|_{f_c=0} &= \tilde{\lambda}_f f_n > 0. \end{aligned}$$

Thus, it follows that from Lemma 1 that  $\mathbb{R}_+^7$  is an invariant set and positive.  $\square$

### 3.2 Existence and uniqueness of solutions

We now show that the solutions of systems (2) are bounded. We thus have the following result.

**Theorem 2.** *The solutions of model system (2) are contained in the region  $\Omega \in \mathbb{R}_+^7$ , which is given by*

$$\Omega = \{(s_h, s_a, i_h, l, m_a, f_n, f_c) \in \mathbb{R}_+^7 : 0 \leq s_h + s_a + i_h \leq 1, 0 \leq l \leq 1, 0 \leq m_a \leq \frac{\pi}{\mu_0}, 0 \leq f_n + f_c \leq 1\} \text{ for the initial conditions (3) in } \Omega.$$

*Proof.* Considering the total change in the human population from the model system (2) given by

$$\frac{dn}{dt} = \mu_h(1 - s_h - s_a - i_h) + \delta_h(1 - s_h - s_a - i_h) - \gamma i_h, \quad (6)$$

for  $n = s_h + s_a + i_h \leq 1$  we obtain

$$\begin{aligned} \frac{dn}{dt} &= \mu_h(1 - n) + \delta_h(1 - n) - \gamma i_h, \\ &\leq (\mu_h + \delta_h)(1 - n), \end{aligned}$$

whose solution is

$$n(t) \leq 1 - n(0) \exp[-(\mu_h + \delta_h)t],$$

where  $n(0) = s_h(0) + s_a(0) + i_h(0)$  is the initial condition. We note that  $0 \leq n \leq 1 - n(0)e^{-(\mu_h + \delta_h)t}$ , so that  $n(t)$  is bounded provided that  $n(0) \geq 0$ .

The equation

$$\frac{dl}{dt} = r_l l(1 - l)$$

for the Listeria compartment has a standard solution for a logistic equation

$$l(t) = \frac{1}{1 + \Theta_1 \exp[-r_l t]},$$

which is bounded with  $\Theta_1 = \exp[-c]$ , where  $c$  is a constant.

On the other hand, the total change in the amount of food products resulting from summing the last two equations of (2) is given by

$$\begin{aligned} \frac{df}{dt} &= \mu_f - \mu_f f, \\ &\leq \mu_f(1 - f), \end{aligned}$$

whose solution is

$$f(t) = 1 - f(0) \exp[-\mu_f t],$$

where  $f(0) = f_n(0) + f_c(0)$ . Here,  $f_c(t) \leq 1$  as  $t \rightarrow \infty$  and hence it is bounded above. We thus, conclude that all the solutions of system (2) are bounded, biologically feasible and remains in  $\Omega$  for all  $t \in [0, \infty)$ . This completes the proof.  $\square$

### 3.3 Steady states and its analyses

The steady states of the model system (2) are obtained by equating the right side of equations (2) to zero, so that

$$\left\{ \begin{array}{l} \mu_h + \delta_h(1 - s_h^* - s_a^* - i_h^*) + \omega_1 s_a^* - (\beta_1 f_c^* + \mu_h + \tilde{\rho} m_a^*) s_h^* = 0, \\ \tilde{\rho} m_a^* s_h^* - (\omega_1 + \mu_h) s_a^* = 0, \\ \beta_1 f_c^* s_h^* - (\mu_h + \gamma) i_h^* = 0, \\ r_l l^*(1 - l^*) - \xi l^* = 0, \\ \pi i_h^* - \mu_0 m_a^* = 0, \\ \mu_f - (\beta_2 l^* + \beta_3 f_c^* + \mu_f) f_n^* = 0, \\ (\beta_2 l^* + \beta_3 f_c^*) f_n^* - \mu_f f_c^* = 0. \end{array} \right. \quad (7)$$



From the fourth equation of system (7), we have  $l^* = 0$  or  $l^* = \frac{q}{r_l}$ , where  $q = (r_l - \xi)$  and  $r_l > \xi$ . We consider the two cases separately.

**CASE A:** If  $l^* = 0$ , (i.e. if there is no Listeria in the environment) then from the second last equation of (7) we have that

$$f_n^* = \frac{\mu_f}{\beta_3 f_c^* + \mu_f}. \quad (8)$$

Substituting (8) into the last equation of (7) we obtain

$$\beta_3 \mu_f f_c^* - \mu_f f_c^* (\beta_3 f_c^* + \mu_f) = 0,$$

and upon simplification we have

$$f_c^* = 0 \quad \text{or} \quad f_c^* = \frac{\beta_3 - \mu_f}{\beta_3}. \quad (9)$$

Thus, if  $l^* = 0$  then  $f_c^* = 0$ ,  $\tilde{\lambda}_h = \tilde{\lambda}_f = 0$ ,  $f_n^* = 1$  and  $i_h^* = 0$ ,  $m_a^* = 0$ ,  $s_a^* = 0$ . Also, from the first equation of (7)

$$s_h^* = 1$$

This results in the disease-free steady states (DFS) given by

$$E_0^* = (1, 0, 0, 0, 0, 1, 0).$$

On the other hand, from (9), we have

$$f_c^* = \frac{\mu_f}{\beta_3} (\mathcal{R}_f - 1),$$

where

$$\mathcal{R}_f = \frac{\beta_3}{\mu_f}.$$

We thus have the following result on the existence of  $f_c^*$ .

**Lemma 2.** *The existence of  $f_c^*$  is subject to  $\mathcal{R}_f > 1$ .*

However, we note that  $\beta_3$  is the contamination rate contributed by contaminated food products and  $\frac{1}{\mu_f}$  is the duration of food contamination. So,  $\mathcal{R}_f$  can be defined as the ‘‘food contamination threshold’’ that measures the growth of contaminated food due to the contamination of uncontaminated food products by contaminated food products. This is equivalent to the basic reproduction number ( $\mathcal{R}_0$ ) in disease modelling, see [24].

If  $f_c^* = \frac{\mu_f}{\beta_3} (\mathcal{R}_f - 1)$ , then expressing the second, third, and fifth equations of (7) in terms of  $i_h^*$  we obtain the following equation

$$\begin{aligned} m_a^* &= \phi_0 i_h^*, \\ s_h^* &= \phi_1 i_h^*, \\ s_a^* &= \phi_2 i_h^{*2}, \end{aligned} \quad (10)$$

where  $\phi_0 = \frac{\pi}{\mu_0}$ ,  $\phi_1 = \frac{\beta_3(\mu_h + \gamma)}{\beta_1\mu_f(\mathcal{R}_f - 1)}$  and  $\phi_2 = \frac{\tilde{\rho}\phi_0\phi_1}{(\mu_h + \omega_1)}$ . Substituting all the expressions in equation (10) into the first equation of (7) and after some algebraic simplifications we obtain the following quadratic equation

$$\xi_2 i_h^{*2} + \xi_1 i_h^* + \xi_0 = 0, \quad (11)$$

where

$$\begin{aligned} \xi_0 &= -\beta_3(\mu_h + \delta_h) < 0, \\ \xi_1 &= \gamma + \mu_h + \delta_h + \frac{\beta_3(\mu_h + \gamma)(\mu_h + \delta_h)}{\beta_1\mu_f(\mathcal{R}_f - 1)} > 0 \text{ if } \mathcal{R}_f > 1, \\ \xi_2 &= \frac{\pi\tilde{\rho}\beta_3(\mu_h + \gamma)(\mu_h + \delta_h)}{\beta_1\mu_0\mu_f(\mu_h + \omega_1)(\mathcal{R}_f - 1)} > 0 \text{ if } \mathcal{R}_f > 1. \end{aligned}$$

However, we note that the solutions of the quadratic equation (11) are given by

$$i_h^* = \frac{-\xi_1 \pm \sqrt{\xi_1^2 - 4\xi_2\xi_0}}{2\xi_2}.$$

The solutions to (11) has one positive root when  $\mathcal{R}_f > 1$ . Biologically, this implies that the disease will persist and eventually invade the human population. This results in the Listeria steady state (LFS)

$$E_1^* = \left( \phi_1 i_h^*, \phi_2 i_h^*, 0, \phi_0 i_h^*, \frac{1}{\mathcal{R}_f}, \frac{\mu_f}{\beta_3}(\mathcal{R}_f - 1) \right).$$

We note that at Listeria disease free steady state, there are contaminated food products which may result in Listeriosis infection in the human population.

**Remark 1.** We note that, when  $l^* = 0$ , we have two steady states  $E_0^*$  and  $E_1^*$ . The existence of  $E_1^*$  is subject to the contaminated food generation number ( $\mathcal{R}_f$ ) been greater than 1. As long as  $\mathcal{R}_f > 1$ , even without Listeria in the environment, we will have the disease in the human population.

**CASE B:** If  $l^* = \frac{q}{r_l}$ , then from last equation of (7) solving for new  $f_n^*$ , we have

$$f_n^{*+} = \frac{\mu_f f_c^*}{\beta_3 f_c^* + \frac{\beta_2 q}{r_l}}. \quad (12)$$

Substituting (12), into second last equation of (7) we obtain the following expression in terms of  $f_c^*$  after some algebraic simplifications

$$\nu_2 f_c^{*2} + \nu_1 f_c^* + \nu_0 = 0, \quad (13)$$

where

$$\begin{aligned}\nu_0 &= -\beta_2 q \mu_f < 0, \\ \nu_1 &= \beta_2 \mu_f q + \mu_f^2 r_l (1 - \mathcal{R}_f), \\ \nu_2 &= \beta_3 \mu_f r_l > 0.\end{aligned}$$

The solutions of the quadratic equation (13) given by

$$f_c^* = \frac{-\nu_1 \pm \sqrt{\nu_1^2 - 4\nu_2\nu_0}}{2\nu_2},$$

has one positive root irrespective of the signs of  $\nu_1$ . The solutions of  $f_c^*$  say  $f_c^{*+}$  exists, but cannot be determined due to its intractability. Hence, as long as  $l^* = 1$  we have a positive  $f_c^{*+}$ .

Now, we express the second, third and fifth equation of (7) in terms of  $i_h^*$  and obtain the following expressions

$$\begin{aligned}m_a^* &= \Psi_0 i_h^*, \\ s_h^* &= \Psi_1 i_h^*, \\ s_a^* &= \Psi_2 i_h^{*2},\end{aligned}\tag{14}$$

respectively, where  $\Psi_0 = \frac{\pi}{\mu_0}$ ,  $\Psi_1 = \frac{(\gamma + \mu_h)}{\beta_1 f_c^{*+}}$  and  $\Psi_2 = \frac{\tilde{\rho}\Psi_0\Psi_1}{\mu_h + \omega_1}$ . Similarly, substituting all the expressions from equations (14) into the first equation of (7) and after some algebraic manipulations we obtain the following quadratic equation in terms of  $i_h^*$

$$\xi_5 i_h^{*2} + \xi_4 i_h^* + \xi_3 = 0,\tag{15}$$

where

$$\begin{aligned}\xi_3 &= -(\mu_h + \delta_h) < 0, \\ \xi_4 &= \frac{(\mu_h + \gamma)(\mu_h + \delta_h) + \beta_1 f_c^{*+}(\delta_h + \mu_h + \gamma)}{\beta_1 f_c^{*+}} > 0, \\ \xi_5 &= \frac{\pi\rho(\gamma + \mu_h)(\delta_h + \mu_h)}{\beta_1\mu_0 f_c^{*+}(\mu_h + \omega_1)} > 0.\end{aligned}$$

The solutions ( $i_h^*$ ) of the quadratic equation (15) given by

$$i_h^* = \frac{-\xi_4 \pm \sqrt{\xi_4^2 - 4\xi_5\xi_3}}{2\xi_5},$$

exists and has one positive root. We thus have the following result on the existence of new  $i_h^*$  say  $i_h^{*+}$ .

**Lemma 3.** *The steady state  $i_h^{*+}$  exists whenever  $f_c^{*+}$  exists.*

This results in the endemic steady states (ESS) given by

$$E_2^* = (s_h^{*+}, s_a^{*+}, l_1^*, m_a^{*+}, f_n^{*+}) = \left( \Psi_1 i_h^{*+}, \Psi_2 i_h^{*+}, 1, \Psi_0 i_h^{*+}, \frac{\mu_f f_c^{*+}}{\beta_3 f_c^{*+} + \beta_2} \right).$$

Hence, at endemic steady state, there are contaminated food products which result in the persistence of the *Listeria* infections in the human population.

### 3.3.1 Local stability of the disease-free steady state

To analyse the local stability of the DFS, we show that the eigenvalues of the Jacobian matrix at DFS have negative real parts. We now state the following theorem for the DFS.

**Theorem 3.** *The disease-free steady state ( $E_0^*$ ) is always stable whenever  $\mathcal{R}_f < 1$  and  $r_l < \xi$ .*

*Proof.* The Jacobian of system (2) is given by the block matrix

$$J = \left( \begin{array}{cc|cc} A_1 & A_2 & & \\ \hline & & A_3 & A_4 \end{array} \right), \quad (16)$$

where

$$A_1 = \begin{pmatrix} -(\delta_h + \tilde{\rho} m_a^*) & -\delta_h + \omega_1 & -\delta_h & 0 \\ \tilde{\rho} m_a^* & -(\omega_1 + \mu_h) & 0 & 0 \\ \beta_1 f_c^* & 0 & -(\mu_h + \gamma) & 0 \\ 0 & 0 & 0 & \mathcal{F}_0 \end{pmatrix}, \quad A_2 = \begin{pmatrix} -\tilde{\rho} s_h^* & 0 & -\beta_1 s_h^* \\ \tilde{\rho} s_h^* & 0 & 0 \\ 0 & 0 & \beta_1 s_h^* \\ 0 & 0 & 0 \end{pmatrix}$$

$$A_3 = \begin{pmatrix} 0 & 0 & \pi & 0 \\ 0 & 0 & 0 & -\beta_2 f_n^* \\ 0 & 0 & 0 & \beta_2 f_n^* \end{pmatrix}, \quad \text{and } A_4 = \begin{pmatrix} -\mu_0 & 0 & 0 \\ 0 & -(\beta_2 l^* + \beta_3 f_c^* + \mu_f) & -\beta_3 f_n^* \\ 0 & \beta_2 l^* + \beta_3 f_c^* & \beta_3 f_n^* - \mu_f \end{pmatrix}$$

in which  $\mathcal{F}_0 = r_l - \xi - 2r_l l^*$ . Evaluating (16) at DFS, we have that

$$J(E_0^*) = \left( \begin{array}{cc|cc} J_1(E_0^*) & J_2(E_0^*) & & \\ \hline & & J_3(E_0^*) & J_4(E_0^*) \end{array} \right),$$

where

$$J_1(E_0^*) = \begin{pmatrix} -\delta_h & \omega_1 - \delta_h & -\delta_h & 0 \\ 0 & -(\omega_1 + \mu_h) & 0 & 0 \\ 0 & 0 & -(\mu_h + \gamma) & 0 \\ 0 & 0 & 0 & r_l - \xi \end{pmatrix}, \quad J_2(E_0^*) = \begin{pmatrix} -\tilde{\rho} & 0 & -\beta_1 \\ \tilde{\rho} & 0 & 0 \\ 0 & 0 & \beta_1 \\ 0 & 0 & 0 \end{pmatrix},$$

$$J_3(E_0^*) = \begin{pmatrix} 0 & 0 & \pi_0\alpha & 0 \\ 0 & 0 & 0 & -\beta_2 \\ 0 & 0 & 0 & \beta_2 \end{pmatrix} \quad \text{and} \quad J_4(E_0^*) = \begin{pmatrix} -\mu_0 & 0 & 0 \\ 0 & -\mu_f & -\beta_3 \\ 0 & 0 & \beta_3 - \mu_f \end{pmatrix}.$$

Similar to the eigenvalues approach [22], the eigenvalues of  $J(E_0^*)$  are:  $\lambda_1 = -\delta_h$ ,  $\lambda_2 = -(\omega_1 + \mu_h)$ ,  $\lambda_3 = -(\mu_h + \gamma)$ ,  $\lambda_4 = (r_l - \xi) < 0$ , if  $r_l < \xi$ ,  $\lambda_5 = -\mu_0$ ,  $\lambda_6 = -\mu_f$  and  $\lambda_7 = \mu_f(\mathcal{R}_f - 1)$ . We note eigenvalues are negatives hence  $E_0^*$  is stable.  $\square$

### 3.3.2 Local Stability of the Listeria-free steady state

We state the following theorem for the local stability of Listeria-free steady state.

**Theorem 4.** *The Listeria-free steady state ( $E_1^*$ ) is always stable whenever  $\mathcal{R}_f < 1$  and  $r_l < \xi$ .*

*Proof.* Evaluating (16) at Listeria-free steady state, we have that

$$J(E_1^*) = \begin{pmatrix} J_1(E_1^*) & J_2(E_1^*) \\ J_3(E_1^*) & J_4(E_1^*) \end{pmatrix},$$

where

$$J_1(E_1^*) = \begin{pmatrix} -(\delta_h + \tilde{\rho}\phi_0 i_h^*) & -\delta_h + \omega_1 & -\delta_h & 0 \\ \tilde{\rho}\phi_0 i_h^* & -(\omega_1 + \mu_h) & 0 & 0 \\ \frac{\beta_1 \mu_f}{\beta_3} (\mathcal{R}_f - 1) & 0 & -(\mu_h + \gamma) & 0 \\ 0 & 0 & 0 & r_l - \xi \end{pmatrix}, \quad J_2(E_1^*) = \begin{pmatrix} -\tilde{\rho}\phi_1 i_h^* & 0 & -\beta_1 \phi_1 i_h^* \\ \tilde{\rho}\phi_1 i_h^* & 0 & 0 \\ 0 & 0 & \beta_1 \phi_1 i_h^* \\ 0 & 0 & 0 \end{pmatrix},$$

$$J_3(E_1^*) = \begin{pmatrix} 0 & 0 & \pi_0\alpha & 0 \\ 0 & 0 & 0 & \frac{-\beta_2}{\mathcal{R}_f} \\ 0 & 0 & 0 & \frac{\beta_2}{\mathcal{R}_f} \end{pmatrix}, \quad \text{and} \quad J_4(E_1^*) = \begin{pmatrix} -\mu_0 & 0 & 0 \\ 0 & -\mu_f \mathcal{R}_f & \frac{-\beta_3}{\mathcal{R}_f} \\ 0 & \mu_f (\mathcal{R}_f - 1) & \frac{\beta_3}{\mathcal{R}_f} - \mu_f \end{pmatrix}.$$

The eigenvalues from  $J_1(E_1^*)$  are:  $\lambda_1 = (r_l - \xi) < 0$  if  $r_l < \xi$  and the solutions to the cubic equation

$$\lambda^3 + a_2\lambda^2 + a_1\lambda + a_0 = 0,$$

where

$$a_0 = \frac{1}{\beta_3 \mu_0} \left( \beta_3 (\gamma + \mu_h) (\pi \tilde{\rho} \mu_h i_h^* + \delta_h (\pi \tilde{\rho} i_h^* + \mu_0 (\mu_h + \omega_1))) + (\beta_1 \mu_0 \mu_f \delta_h (\mu_h + \omega_1) (\mathcal{R}_f - 1)) \right),$$

$$a_1 = \frac{1}{\beta_3 \mu_0} \left( \beta_3 \left( \pi \tilde{\rho} i_h^* (2\mu_h + \delta_h + \gamma) + \mu_0 \left( (\mu_h + \gamma) (\mu_h + \omega_1) + \delta_h (2\mu_h + \omega_1 + \gamma) \right) \right) + (\beta_1 \mu_0 \mu_f \delta_h) (\mathcal{R}_f - 1) \right),$$

$$a_2 = 2\mu_h + \delta_h + \omega_1 + \gamma + \frac{\pi \tilde{\rho} i_h^*}{\mu_0}.$$

Given that  $a_0, a_1$  and  $a_2$  are positive provided that  $\mathcal{R}_f > 1$ , we note that

$$a_2 a_1 - a_0 = \frac{1}{\beta_3 \mu_0^2} \left( \Upsilon_0 + \beta_1 \delta_h \mu_0 \mu_f (\pi \tilde{\rho} i_h^* + \mu_0 (\gamma + \delta_h + \mu_h)) (\mathcal{R}_f - 1) \right),$$

for

$$\Upsilon_0 = \beta_3 (\pi \tilde{\rho} i_h^* + \mu_0 (\delta_h + \mu_h + \omega_1)) (\pi \tilde{\rho} i_h^* (\gamma + \delta_h + 2\mu_h) + \mu_0 (\gamma + \delta_h + \mu_h) \mathcal{F}_1)$$

and  $\mathcal{F}_1 = (2\mu_h + \omega_1 + \gamma)$ . We also, note that  $a_2 a_1 - a_0 > 0$  if  $\mathcal{R}_f > 1$ . Hence, by the Routh-Hurwitz criterion the eigenvalues of  $J(E_1^*)$  have negative real parts. The rest of the eigenvalues are determined from  $J_4(E_1^*)$ , which are;  $\lambda_5 = -\mu_0$  and the solutions to the quadratic equation

$$\lambda^2 + a_4 \lambda + a_3 = 0,$$

where

$$a_3 = \mu_f \mathcal{R}_f + \mu_f \left( 1 - \frac{1}{\mathcal{R}_f^2} \right) \quad \text{and} \quad a_4 = \mu_f \mathcal{R}_f \left( 1 - \frac{1}{\mathcal{R}_f^3} \right).$$

We thus have that  $a_3 > 0$  and  $a_4 > 0$  if  $\mathcal{R}_f > 1$  and  $a_4$  is always positive. Therefore, the eigenvalues have negative real parts by Routh-Hurwitz criteria. Hence,  $E_1^*$  is locally asymptotically stable.  $\square$

### 3.3.3 Local stability of the endemic steady state

We now state the following theorem on the local stability of endemic steady state.

**Theorem 5.** *The endemic steady state ( $E_2^*$ ), is always locally asymptotically stable if  $\mathcal{R}_f > 1$  and  $r_l > \xi$ .*

*Proof.* Evaluating (16) at endemic steady state, we have that

$$J(E_2^*) = \begin{pmatrix} J_1(E_2^*) & J_2(E_2^*) \\ J_3(E_2^*) & J_4(E_2^*) \end{pmatrix},$$

where

$$J_1(E_2^*) = \begin{pmatrix} -(\delta_h + \tilde{\rho} \Psi_0 i_h^{*+}) & -\delta_h + \omega_1 & -\delta_h & 0 \\ \tilde{\rho} \Psi_0 i_h^{*+} & -(\omega_1 + \mu_h) & 0 & 0 \\ \beta_1 f_n^{*+} & 0 & -(\mu_h + \gamma) & 0 \\ 0 & 0 & 0 & -(r_l - \xi) \end{pmatrix},$$

$$J_2(E_2^*) = \begin{pmatrix} -\tilde{\rho} \Psi_1 i_h^{*+} & 0 & -\beta_1 \Psi_1 i_h^{*+} \\ \tilde{\rho} \Psi_1 i_h^{*+} & 0 & 0 \\ 0 & 0 & \beta_1 \Psi_1 i_h^{*+} \\ 0 & 0 & 0 \end{pmatrix},$$

$$J_3(E_2^*) = \begin{pmatrix} 0 & 0 & \pi_0 \alpha & 0 \\ 0 & 0 & 0 & -\beta_2 f_n^{*+} \\ 0 & 0 & 0 & \beta_2 f_n^{*+} \end{pmatrix} \quad \text{and} \quad J_4(E_2^*) = \begin{pmatrix} -\mu_0 & 0 & 0 \\ 0 & -(\beta_2 + \beta_3 f_c^{*+} + \mu_f) & -\beta_3 f_n^{*+} \\ 0 & \beta_2 + \beta_3 f_c^{*+} & \beta_3 f_n^{*+} - \mu_f \end{pmatrix}.$$

The eigenvalues from  $J_1(E_2^*)$  are:  $\lambda_1 = -(r_l - \xi) < 0$  if  $r_l > \xi$  and the solutions to the cubic equation

$$\lambda^3 + b_2\lambda^2 + b_1\lambda + b_0 = 0,$$

where

$$b_0 = \frac{1}{\mu_0} \left( \pi \tilde{\rho} i_h^{*+} \mu_h (\gamma + \mu_h) + \delta_h (\pi \tilde{\rho} i_h^{*+} (\gamma + \mu_h) + \mu_0 \mathcal{D}_0) \right),$$

$$b_1 = \frac{1}{\mu_0} \left( \pi \tilde{\rho} i_h^{*+} (\gamma + \delta_h + 2\mu_h) + \mu_0 ((\gamma + \mu_h) (\mu_h + \omega_1) + \delta_h \mathcal{D}_1) \right),$$

$$b_2 = 2\mu_h + \delta_h + \omega_1 + \gamma + \frac{\pi \tilde{\rho} i_h^{*+}}{\mu_0},$$

Note that  $b_0$ ,  $b_1$  and  $b_2$  are positive and

$$b_2 b_1 - b_0 = \frac{1}{\mu_0^2} (\Upsilon_1 + \Upsilon_2) > 0,$$

for

$$\Upsilon_1 = \pi^2 \tilde{\rho}^2 i_h^{*+2} (\gamma + \delta_h + 2\mu_h) + \mu_0^2 (\gamma + \delta_h + \mu_h) \left( (\mu_h + \omega_1) (\gamma + 2\mu_h + \omega_1) + \delta_h (\gamma + \beta_1 f_c^{*+} + 2\mu_h + \omega_1) \right) \text{ and}$$

$$\Upsilon_2 = \pi \tilde{\rho} \mu_0 i_h^{*+} (\delta_h^2 + (\gamma + 2\mu_h)^2 + (2\gamma + 3\mu_h) \omega_1 + \delta_h [\beta_1 f_c^{*+} + 5\mu_h + 2(\gamma + \omega_1)]).$$

Thus, by the Routh-Hurwitz criteria, the eigenvalues have negative real parts. The remaining eigenvalues are determined from  $J_4(E_2^*)$ , which are:  $\lambda_5 = -\mu_0$  and the solutions to the quadratic equation

$$\lambda^2 + b_4\lambda + b_3 = 0,$$

where

$$b_3 = \frac{\mu_f ((\beta_2 + \beta_3 f_c^{*+})^2 + \beta_2 \mu_f)}{\beta_2 + \beta_3 f_c^{*+}} > 0,$$

$$b_4 = \beta_2 + \beta_3 f_c^{*+} + \frac{(2\beta_2 + \beta_3 f_c^{*+}) \mu_f}{\beta_2 + \beta_3 f_c^{*+}} > 0.$$

Hence, the eigenvalues have negative real parts by Routh-Hurwitz criterion. Therefore, all the eigenvalues of  $J(E_2^*)$  have negative real parts. Thus,  $E_2^*$  is locally asymptotically stable and otherwise unstable.  $\square$

## 4 Numerical results

### 4.1 Parameter values

Numerical simulations of the model system (2) were done using the set of parameters values given in Table 1. Most of the parameter values were estimated since there are very few mathematical models in literature, that have been done on *L. Monocytogenes* disease dynamics and hence the parameter values are elusive. We used a fourth order Runge-Kutta numerical scheme implemented in Matlab to perform the simulations with the initial conditions:  $s_h(0) = 0.42, s_a(0) = 0.53, i_h(0) = 0.05, l(0) = 0.1, m_a(0) = 0.25, f_n = 0.2$  and  $f_c = 0.8$ . The initial conditions were hypothetically chosen for the numerical simulations presented in section and are thus only for illustrative purpose and do not represent any observed scenario.

**Table 1:** Parameter values used for numerical simulations.

| Parameter description                    | Symbol         | Value (day <sup>-1</sup> ) | Source  |
|------------------------------------------|----------------|----------------------------|---------|
| Mortality rate of humans                 | $\mu_h$        | 0.02/365                   | [12]    |
| Recovery rate of humans                  | $\gamma$       | 0.02                       | Assumed |
| Rate of loss of immunity for humans      | $\delta_h$     | 0.2                        | [12]    |
| Waning rate of aware susceptibles        | $\omega_1$     | 0.25                       | [15]    |
| Rate of non-aware susceptibles to aware  | $\tilde{\rho}$ | 0.9                        | Assumed |
| Growth rate of Listeria                  | $r_l$          | 0.25                       | [12]    |
| Death rate of Listeria                   | $\xi$          | 0.056                      | Assumed |
| Depletion rate of media campaigns        | $\mu_0$        | 0.03                       | [16]    |
| Implementation rate of media campaigns   | $\pi$          | 0.001                      | [16]    |
| Contact rate between Listeria and humans | $\beta_1$      | 0.0025                     | Assumed |
| Food contamination rate by Listeria      | $\beta_2$      | 0.09                       | Assumed |
| Food contamination rate                  | $\beta_3$      | 0.0048                     | Assumed |
| Removal rate of food products            | $\mu_f$        | 0.056                      | Assumed |

### 4.2 Sensitivity analysis

Sobol sensitivity analysis [25], were used to determine the model parameters that are sensitive to changes in some variable of the model system (2). We performed simulations for some chosen parameters  $\pi, \mu_0, \tilde{\rho}, \omega_1, \beta_1, \beta_2, \beta_3$  and  $\mu_f$  versus some of the model state variables  $s_a, i_h$  and  $f_c$  to show their respective PRCCs over time. These parameters and state variables were selected because they are the most significant in the Listeria disease transmission and control according to our model formulation relating to the subject under investigation. The simulations were done using Matlab with 1000 runs over 800 days as depicted in Figures 4 and 3. The scatter plots for parameters with positive and negative PRCCs are also shown in Figure 2. Thus, an increase in the rate at which susceptible individuals move into the aware susceptible class results in a fewer number of humans been infected with the Listeriosis and parameter  $\omega_1$  with negative correlation signifying that if aware individuals revert to being susceptible, then they are prone to contracting the disease as depicted in Figure 2 respectively. This highlights the importance of media campaigns in disease control.



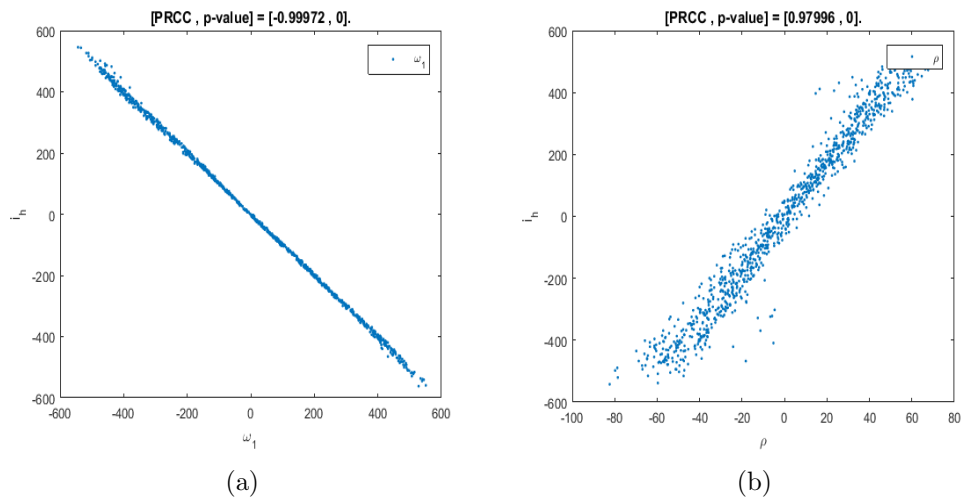

**Figure 2:** Scatter plots of parameters with the negative ( $\tilde{\rho}$ ) and positive ( $\omega_1$ ) PRCCs.

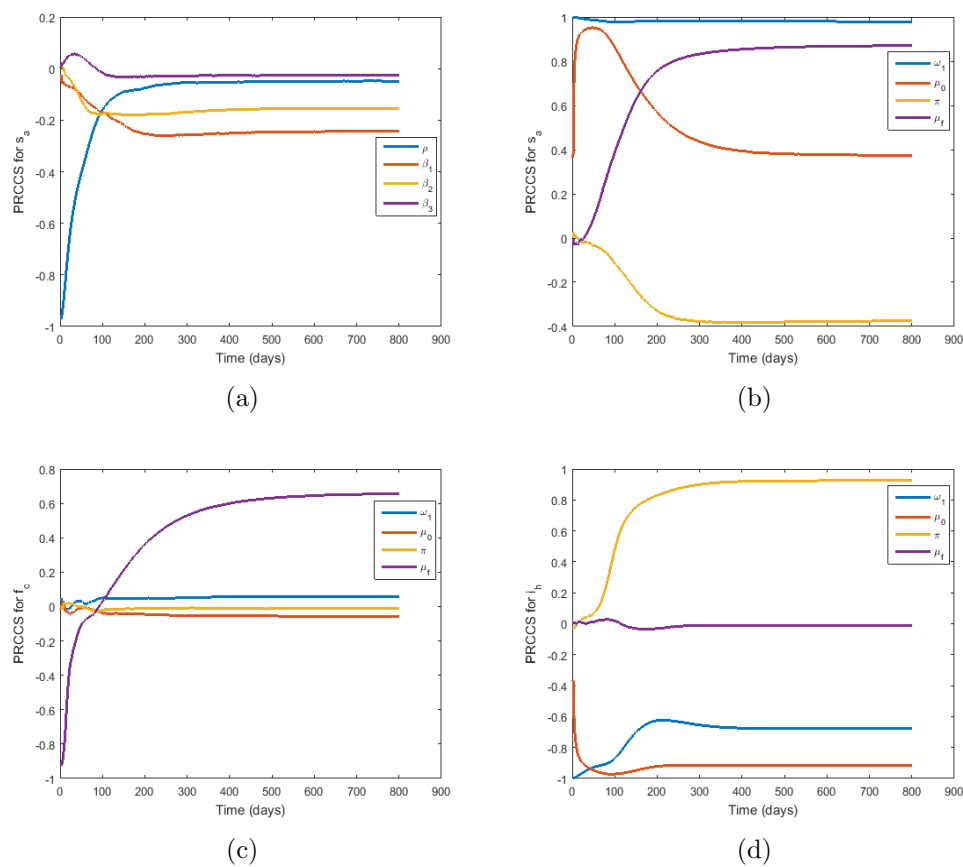

**Figure 3:** Partial correlation coefficients of parameters  $\pi, \mu_0, \tilde{\rho}, \omega_1, \beta_1, \beta_2, \beta_3$  and  $\mu_f$  over time for state variables  $s_a, f_c$  and  $i_h$  respectively. Note that,  $\rho$  in the legend represents  $\tilde{\rho}$  due to Matlab do not compile tilda.

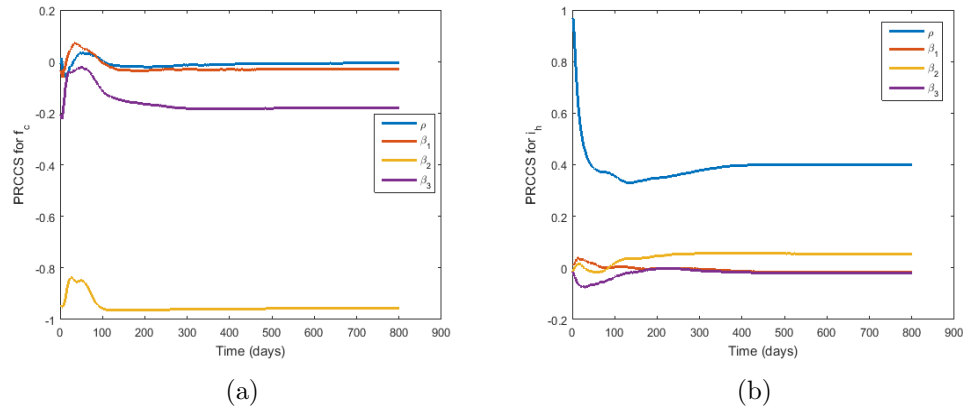

**Figure 4:** Partial correlation coefficients of parameters  $\pi, \mu_0, \tilde{\rho}, \omega_1, \beta_1, \beta_2$  and  $\beta_3$  over time against  $f_c$  and  $i_h$ . Note that,  $\rho$  in the legend represents  $\tilde{\rho}$  due to Matlab do not compile tilda.

### 4.3 Effects of varying $\pi$ and $\mu_0$ on Listeriosis spread

This subsection is devoted to numerical simulations that show the effects of increasing and decreasing media campaigns over time. Figure 5(a) reveals that an increase in the awareness campaigns result in a decrease in the number of infected humans while a reduction of media campaigns results in more humans been infected with Listeriosis as shown in Figure 5(b).

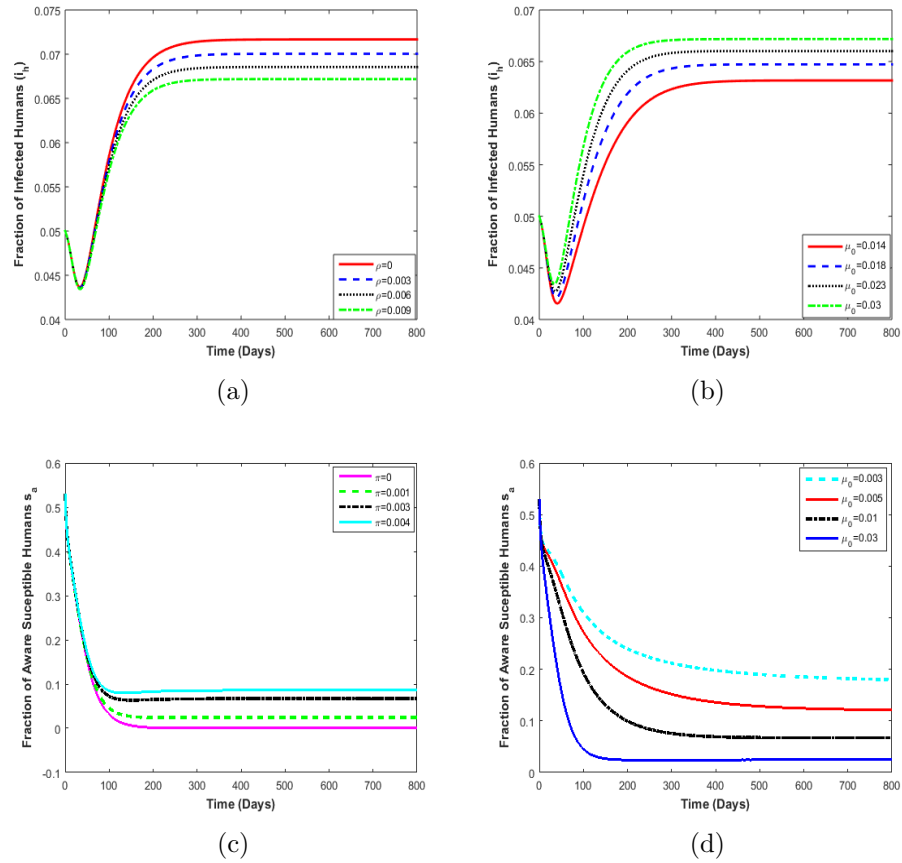

**Figure 5:** (a) Effects of implementing of media campaigns ( $\pi$ ) on the fraction of infected humans. (b) Effects of depletion of media campaigns ( $\mu_0$ ) on the fraction of infected humans. (c) Effects of implementation of media campaigns ( $\pi$ ) on the fraction of aware susceptible humans. (d) Effects of depletion of media campaigns ( $\mu_0$ ) on the fraction of aware susceptible humans.

#### 4.4 Contour plot of $\beta_3$ and $\mu_f$ on $\mathcal{R}_f$

In Figure 6, we present a contour plot of the food contamination rate  $\beta_3$  and rate of food product removal,  $\mu_f$ , versus the food contamination constant,  $\mathcal{R}_f$ . An increase in the contamination of non-contaminated food by contaminated food products results in an increase in the value of  $\mathcal{R}_f$ . Hence, more humans get infected with Listeriosis. Also, an increase in the removal of contaminated food products results in a decrease in the values of  $\mathcal{R}_f$  which implies that fewer humans contract the disease. Note that, the changes in the value of  $\mu_f$  do not significantly impact  $\mathcal{R}_f$  when compared to  $\beta_3$ .

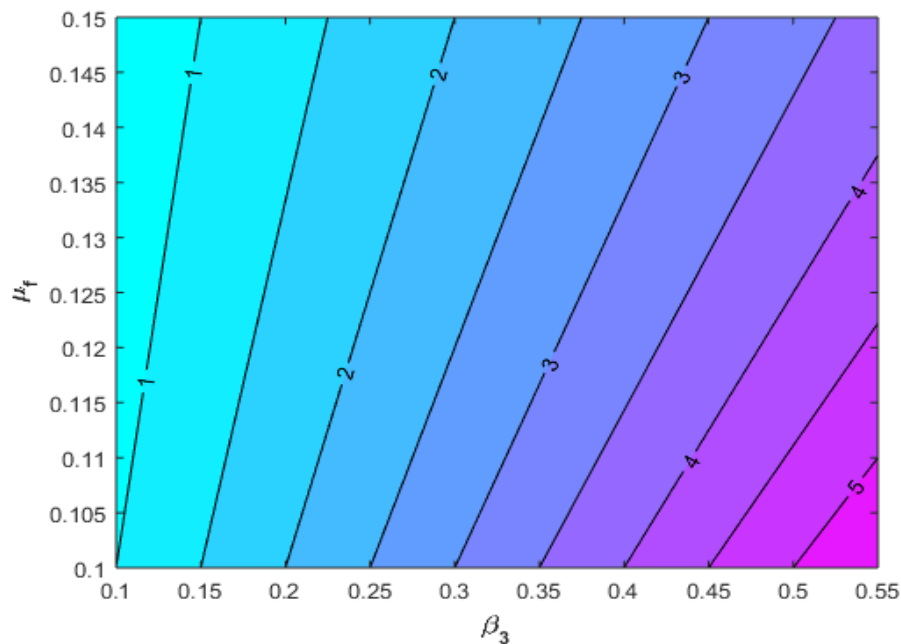

**Figure 6:** Contour plot of contaminated food generation number ( $\mathcal{R}_f$ ) as a function of  $\beta_3$  and  $\mu_f$ .

#### 4.5 Effects of $\beta_3$ and $\mu_f$ on $\mathcal{R}_f$

Figure 7, illustrates a mesh plot showing the variation of  $\beta_3$ ,  $\mu_f$  and the contaminated food generation number  $\mathcal{R}_f$ . It is seen that an increase in the rate of food processing increases  $\mathcal{R}_f$  while an increase in the removal of contaminated food results in a decrease in  $\mathcal{R}_f$ . Note that at the intersection of the plane  $\mathcal{R}_f = 1$  and the mesh plot, we obtain all values of  $\beta_3$  and  $\mu_f$  necessary for the eradication of the disease.

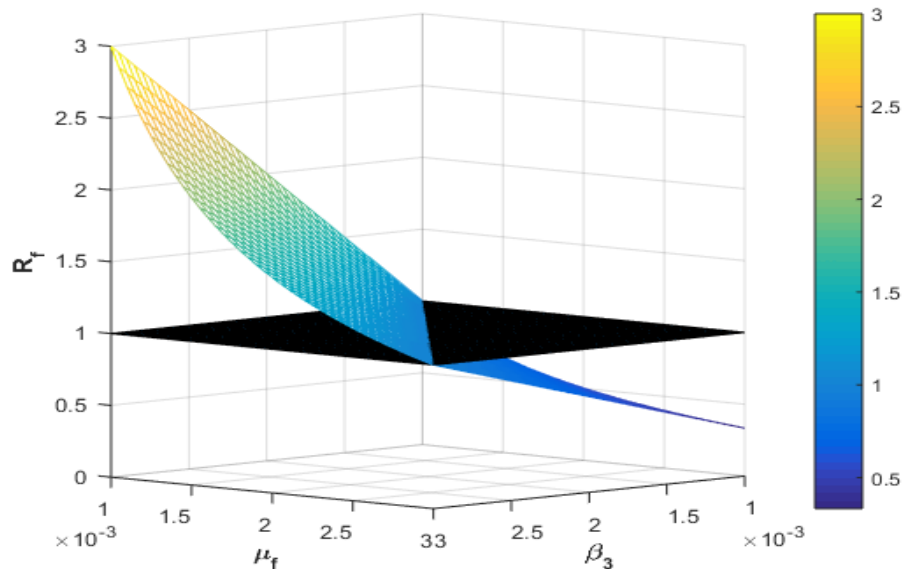

**Figure 7:** Effects of  $\beta_3$  and  $\mu_f$  on the contamination food constant ( $\mathcal{R}_f$ ).

#### 4.6 Impact of varying $\tilde{\rho}$ and $\mu_f$ on infected humans

Figure 8 depicts the effects of varying parameters  $\tilde{\rho}$  and  $\mu_f$ . In Figure 8(b), we observe that increasing  $\tilde{\rho}$  decreases the number of infected humans. This implies that media campaigns have the potential to reduce the number of infectives. On the other hand, an increase in  $\tilde{\rho}$  does not impact the value of the contaminated food generation number,  $\mathcal{R}_f$ . On the other hand, increasing  $\mu_f$  also reduces the number of infected individuals and  $\mathcal{R}_f$  (see Figure 8(a)). So the removal of contaminated food products during an outbreak is an important intervention in the control of Listeriosis.

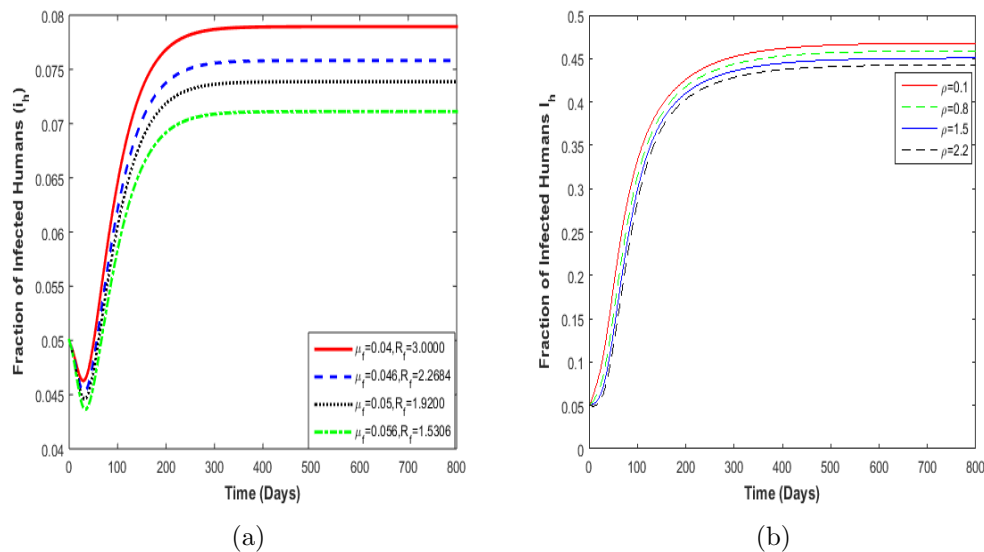

**Figure 8:** (a) Effects varying removal of contaminated food products ( $\mu_f$ ) on the fraction of infected humans. (b) Effects varying the rate of non-aware susceptible becomes aware susceptible ( $\tilde{\rho}$ ) on the fraction of infected humans. The value for the  $\mathcal{R}_f$  is 1.5306.

## 5 Conclusion

A deterministic model on media campaigns' potential role on Listeriosis disease transmissions was developed and analysed in this manuscript. Stability analyses of the model was done in terms of the food contamination constant  $\mathcal{R}_f$ . The model exhibited three different steady states, which are: disease-free, Listeria-free and endemic equilibria. The disease-free and the Listeria-free steady states are locally asymptotically unstable if the net growth rate  $r_l < \xi$  and  $\mathcal{R}_f < 1$  respectively, while the endemic equilibrium state is locally asymptotically stable if  $r_l > \xi$  and  $\mathcal{R}_f > 1$ .

On the other hand from our numerical results, it was established that an increase in the removal of contaminated food products and increase in the rate at which the susceptible individuals ( $s_h$ ) becomes aware susceptible individuals ( $s_a$ ) leads to a decrease in the number of infected humans (see Figure 8). Thus to effectively control Listeria disease spread, policymakers, public health, governments and global stakeholders are advised to implement media campaigns that do not wane as time progresses. This means that media campaigns need to be effective. Further, these interventions from the campaigns should target mainly susceptible individuals on the danger of contracting Listeriosis. As people adhere to the media campaign effectively, it helps reduce and control the number of infected humans leading to less disease transmission.

The model presented in this paper is not without fallibility. The model was not fitted to epidemiological data and we assumed that the infectives do not interact with the aware susceptibles. During Listeriosis spread, the assumption has a negative impact on the human population since fewer un-aware individuals become aware of the disease. Despite these shortcomings, the results obtained in this paper are still implementable to help manage, control or contain Listeriosis.

disease transmission in the event of an outbreak.

## Competing interests

The authors declare that they have are no competing interests.

## Author's contributions

C. W. Chukwu carried out the analytical, and numerical simulations. Both authors formulated and commented on the final version of this work.

## Acknowledgements

The authors would like to thank Faculty of Science in the University of Johannesburg for their support in the production of this manuscript. The authors are grateful to the anonymous reviewers for their lucrative suggestions and comments.

## References

- [1] H. Hof, History and epidemiology of Listeriosis, *FEMS Immunology and Medical Microbiology*, 35(3), (2003), pp. 199–202.
- [2] EFSA Panel on Biological Hazards (BIOHAZ) and Ricci, et al., *Listeria monocytogenes* contamination of ready-to-eat foods and the risk for human health in the EU, *EFSA Journal*, 16(1),(2018), pp.e05134.
- [3] E. Tambo, C.S. Yah, and G. Madjou, Deadly Listeriosis outbreaks in South Africa and Australia: re-inforcing food safety surveillance and emergency response actions, *Journal of Advances in Virology Research*, 1(1), (2018), pp.1–9.
- [4] A. Schuchat, B. Swaminathan and C.V. Broome, Epidemiology of human Listeriosis, *Clinical Microbiology Reviews*, 4(2), (1991), pp.169–183.
- [5] B. Swaminathan and P. Gerner-Smidt, The epidemiology of human Listeriosis. *Microbes and infection*, 9(10), (2007), pp.1236–1243.
- [6] National Listeria Incident Management Team, <http://www.health.gov.za/index.php/component/phocadownload/category/439>, Accessed 20 August 2020.
- [7] J. Li, Effects of behavior change on the spread of AIDS epidemic, *Mathematical and Computer Modelling* 16(6–7), (1992), pp. 103–111.
- [8] D. Njankou, S. Diane and F. Nyabadza, Modelling the potential role of media campaigns in ebola transmission dynamics, *International Journal of Differential Equations*, 2017, Article ID 3758269, (2017), 13 pp.
- [9] C.W. Chukwu, J. Mushanyu and M.L. Juga, Fatmawati, A mathematical model for co-dynamics of listeriosis and bacterial meningitis diseases. *Communication Mathematical Biology Neuroscience*, (2020), 2020, pp.Article-ID.

- [10] C.W. Chukwu and F. Nyabadza, A mathematical model and optimal control for Listeriosis disease from ready-to-eat food products, (2020), medRxiv, <https://www.medrxiv.org/content/10.1101/2020.10.11.20210856v1>.
- [11] S. Osman, O.D. Makinde and D.M. Theuri, Stability analysis and modelling of listeriosis dynamics in human and animal populations, *Global Journal of Pure and Applied Mathematics*, 14(1), (2018), pp.115–137.
- [12] C.W. Chukwu, and F. Nyabadza, A theoretical model of listeriosis driven by cross contamination of ready-to-eat food products, *International Journal of Mathematics and Mathematical Sciences*, 09 March 2020, (2020), 14 pp.
- [13] F. Nyabadza, C. Chiyaka, Z. Mukandavire, and S. Musekwa, Analysis of an HIV/AIDS model with public-health information campaigns and individual withdrawal, *Journal of Biological Systems*, 18(02), (2010), pp. 357–375, <https://doi:10.1142/S0218339010003329>.
- [14] J.M. Tchuenche, N. Dube, C.P. Bhunu, R.J. Smith, and C.T. Bauch, The impact of media coverage on the transmission dynamics of human influenza, *BMC Public Health*, 11(1), (2011), p. S5.
- [15] A.K. Misra, A. Sharma and J.B. Shukla, Modeling and analysis of effects of awareness programs by media on the spread of infectious diseases, *Mathematical and Computer Modelling*, 53(5-6), (2011), (2011), pp. 1221–1228.
- [16] N. Kaur, M. Ghosh, and S.S. Bhatia, Modeling and analysis of an SIRS epidemic model with effect of awareness programs by media, *International Journal Mathematical Computational National Physics Engineering*, 8(1),(2014), pp. 233–239.
- [17] G.O. Agaba, Y.N. Kyrychko and K.B. Blyuss, Mathematical model for the impact of awareness on the dynamics of infectious diseases, *Mathematical Biosciences*, 286, (2017), pp. 22–30.
- [18] A. Sharma and A.K. Misra, Backward bifurcation in a smoking cessation model with media campaigns, *Applied Mathematical Modelling*, 39(3-4), (2015), pp. 1087–1098.
- [19] A. Kumar, P.K. Srivastava and Y. Takeuchi, Modeling the role of information and limited optimal treatment on disease prevalence, *Journal of Theoretical Biology*, 414, (2017), pp. 103–119. <https://doi.org/10.1016/j.jtbi.2016.11.016>
- [20] L. Yiping and C. Jing-an, The impact of media coverage on the dynamics of infectious disease, *International Journal of Biomathematics*, 1(01), (2008), pp. 65–74.
- [21] K.A. Pawelek, A. Oeldorf-Hirsch and L. Rong, Modeling the impact of Twitter on influenza epidemics, *Mathematical Biosciences and Engineering*, 11(6), (2014), pp. 1337–1356.
- [22] P.A. Winter, C.L. Jessop and F.J. Adewusi, The complete graph: eigenvalues, trigonometrical unit-equations with associated t-complete-eigen sequences, ratios, sums and diagrams, *Asian Journal of Mathematical and Scientific Research*, Vol. 9(2),(2015), pp.92–107.
- [23] X. Yang, L. Chen and J. Chen, Permanence and positive periodic solution for the single-species nonautonomous delay diffusive models, *Computers and Mathematics with Applications*, 32(4), (1996), pp. 109–116.
- [24] O. Diekmann, J.A.P. Heesterbeek and J.A.J. Metz, On the definition and the computation of the basic reproduction ratio  $R_0$  in models for infectious diseases in heterogeneous populations, *Journal of Mathematical Biology*, 28(4), (1990), pp. 365–382.
- [25] Marino S., Hogue I.B., Ray C.J., Kirschner D.E. A methodology for performing global uncertainty and sensitivity analysis in systems biology. *Journal of Theoretical Biology*, 254(1),(2008), pp. 178–96.
